# Supplementary material for: Carrageenophyte Kappaphycus malesianus Inhibits Microglia-Mediated Neuroinflammation via Suppression of AKT/NF-κB and ERK Signaling Pathways
Source: MDPI journal article supplement (doi:10.3390/md20080534), 2022-08-20

Figure S1. Original western blot images for three repeats of iNOS, COX-2 and Beta-actin

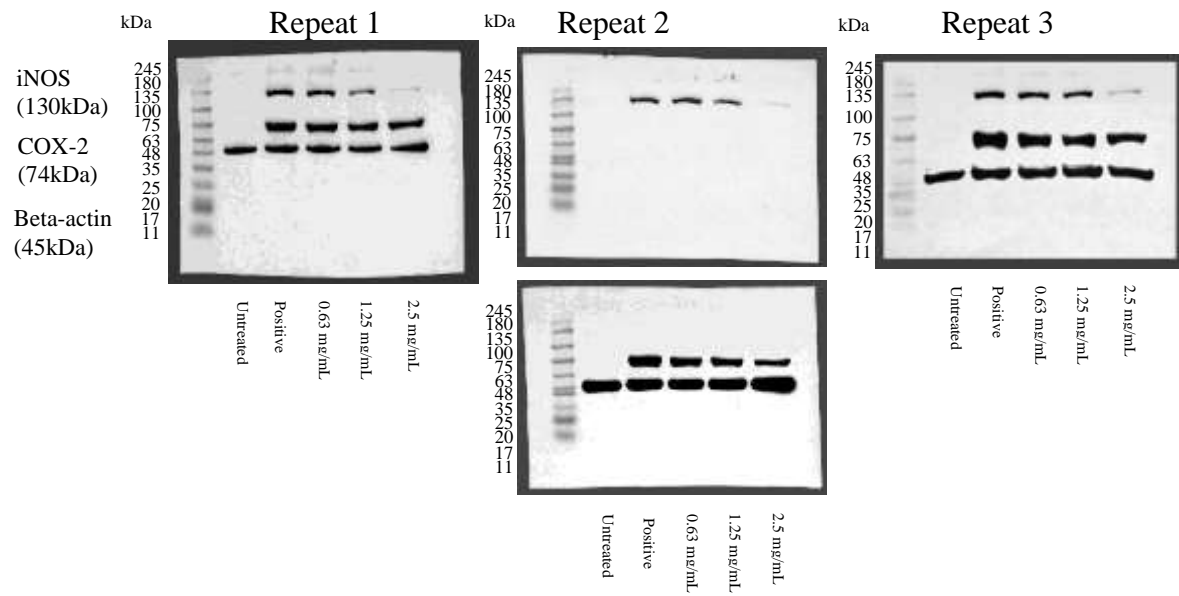

Figure S2. Original western blot images for three repeats of phospho-AKT

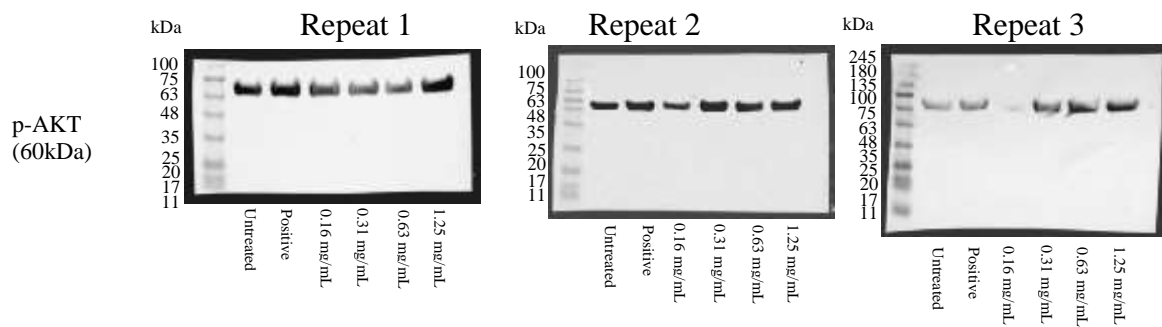

Figure S3. Original western blot images for three repeats of total-AKT and Beta-actin

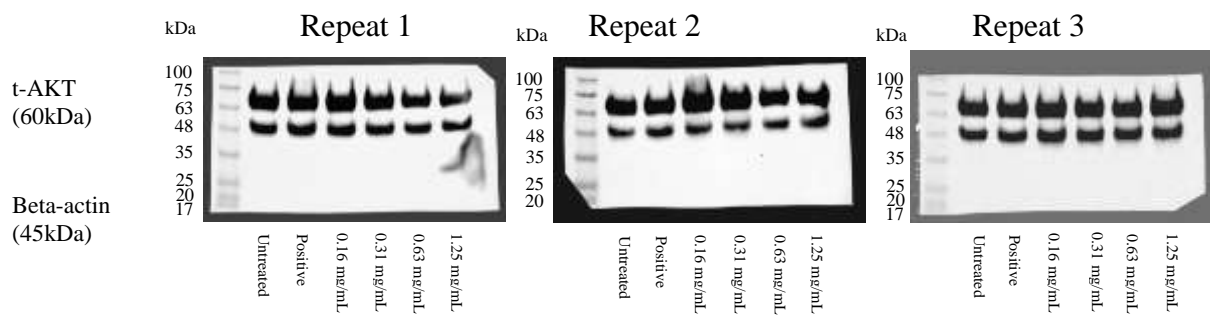

Figure S4. Original western blot images for three repeats of phospho-ERK

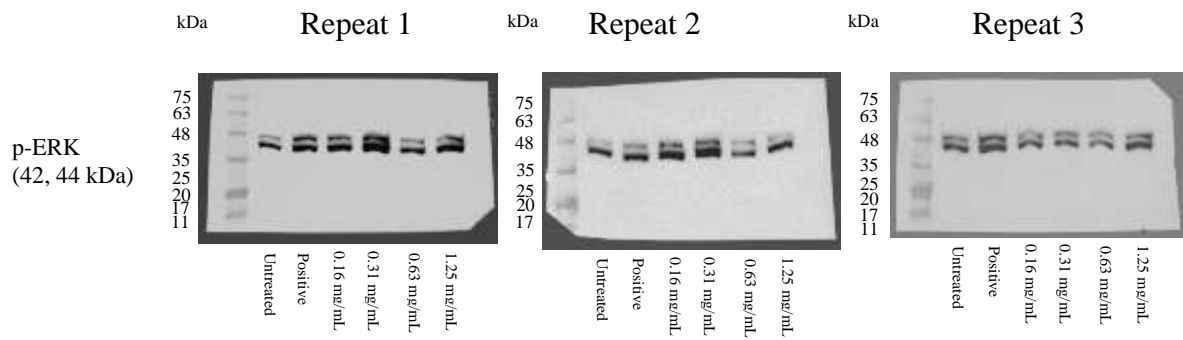

Figure S5. Original western blot images for three repeats of total-ERK and Beta-actin

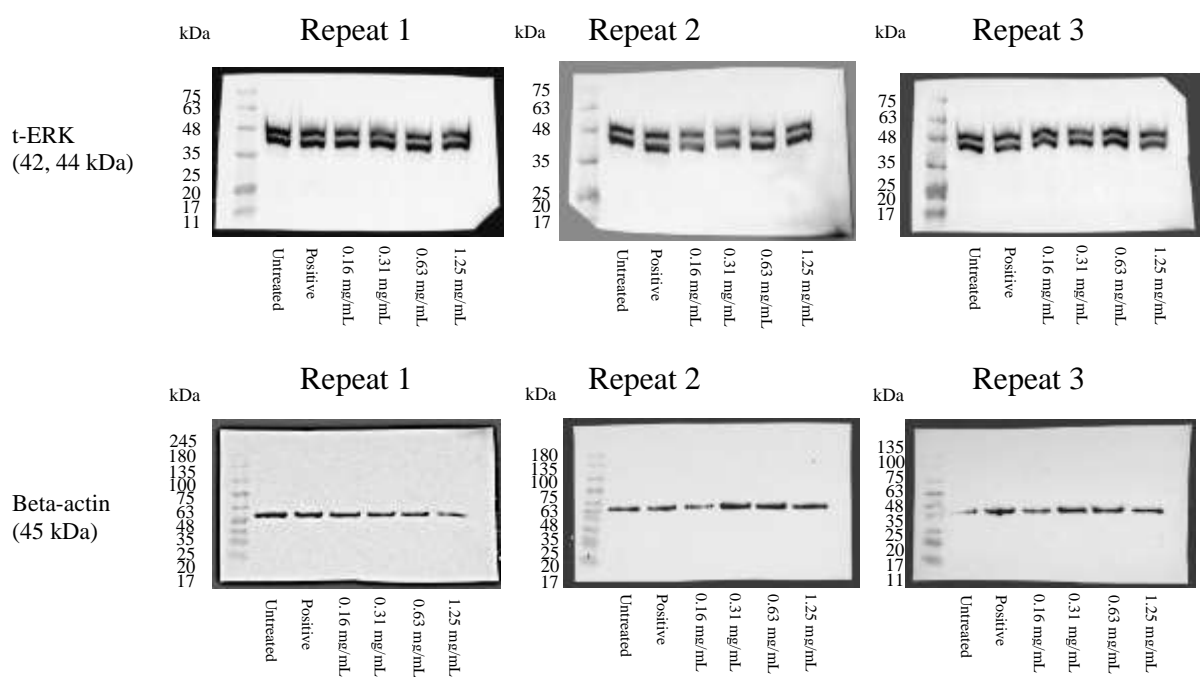

Figure S6. Original western blot images for three repeats of phospho-NF- $\kappa$ B

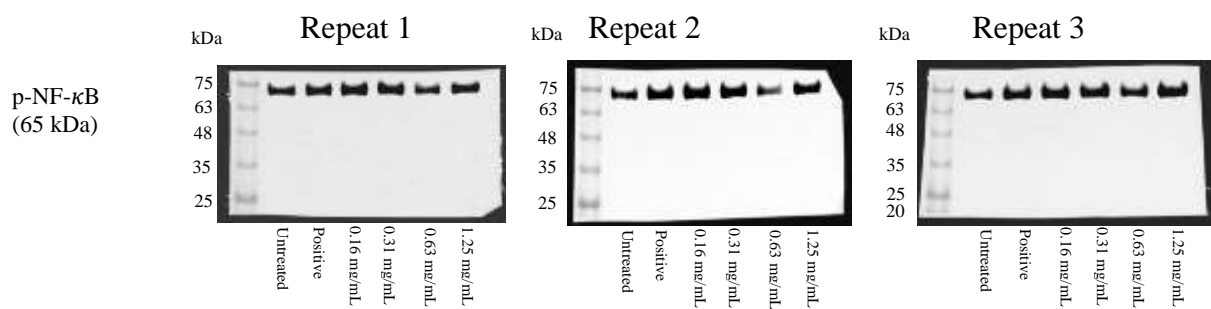

Figure S7. Original western blot images for three repeats of total-NF- $\kappa$ B and Beta-actin

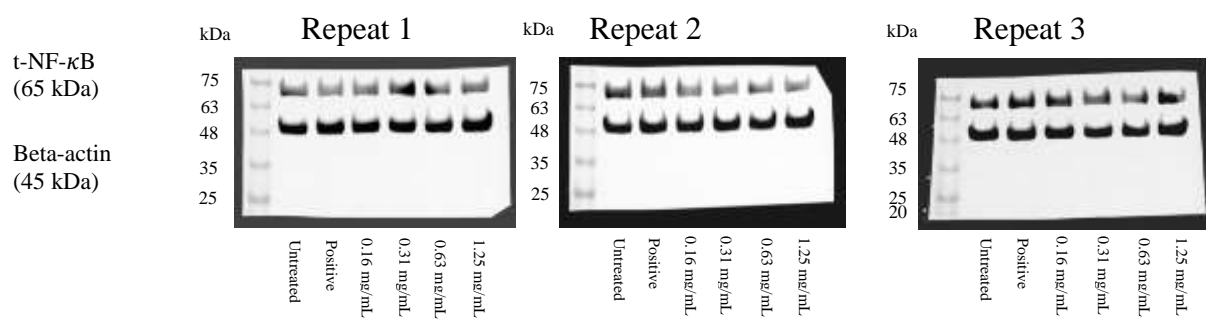

Supplement: s1 [file s1]
